# Supplementary material for: Thermodynamic Analysis of Trisiloxane Surfactant Adsorption and Aggregation Processes
Source: MDPI journal article supplement (doi:10.3390/molecules25235669), 2020-12-01

## SUPPLEMENTARY MATERIAL

### THERMODYNAMIC ANALYSIS OF TRISILOXANE SURFACTANT ADSORPTION AND AGGREGATION PROCESSES

JOANNA KARASIEWICZ<sup>a\*</sup>, JOANNA KRAWCZYK<sup>b\*</sup>

*<sup>a</sup>Chemistry and Technology of Silicon Compounds, Faculty of Chemistry, Adam Mickiewicz  
University in Poznań, Uniwersytetu Poznańskiego 8, 61-614 Poznań, Poland*

*<sup>b</sup>Department of Interfacial Phenomena, Institute of Chemical Sciences, Faculty of Chemistry,  
Maria Curie-Skłodowska University in Lublin, Maria Curie-Skłodowska Sq. 3, 20-031 Lublin,  
Poland*

\* **Corresponding author: e-mail address** [j.krawczyk@poczta.umcs.lublin.pl](mailto:j.krawczyk@poczta.umcs.lublin.pl) (J. Krawczyk)

and [joanka@amu.edu.pl](mailto:joanka@amu.edu.pl) (J. Karasiewicz)

**Fig. S1.** A plot of mole fraction of the area occupied by TS-OE12 at the water-air interface ( $X_s$ ) vs. the logarithm of its concentration ( $\log C_s$ ) at a temperature equal to 293 K, 303 K and 313 K determined from Eq. (4).

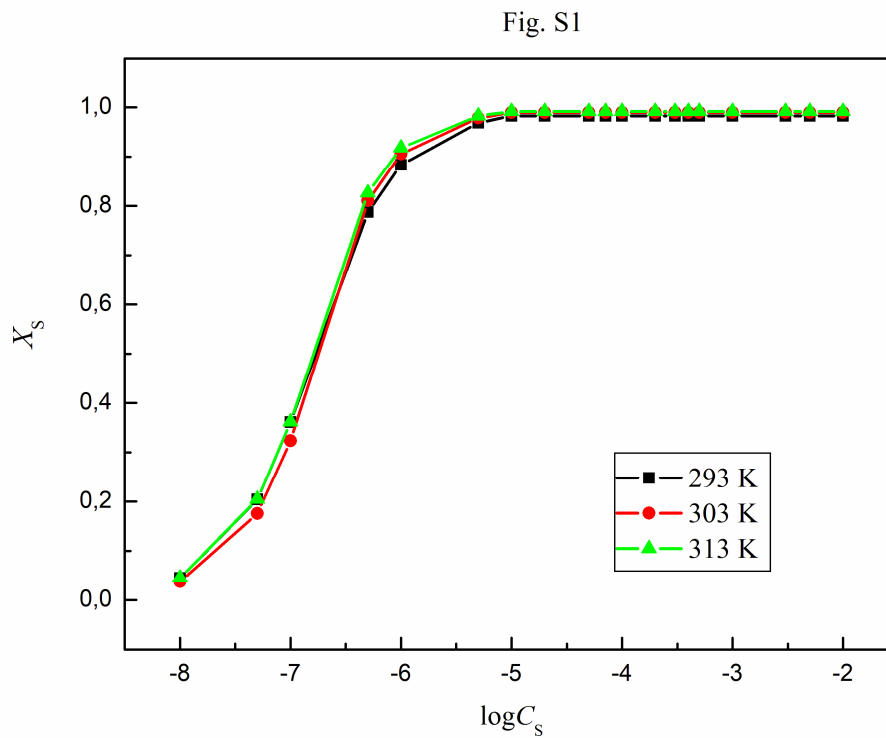

**Fig. S2.** A plot of mole fraction of the area occupied by TS-OE12 at the water-air interface ( $X_s$ ) vs. the logarithm of its concentration ( $\log C_s$ ) at a temperature equal to 293 K, 303 K and 313 K determined from Eq. (6).

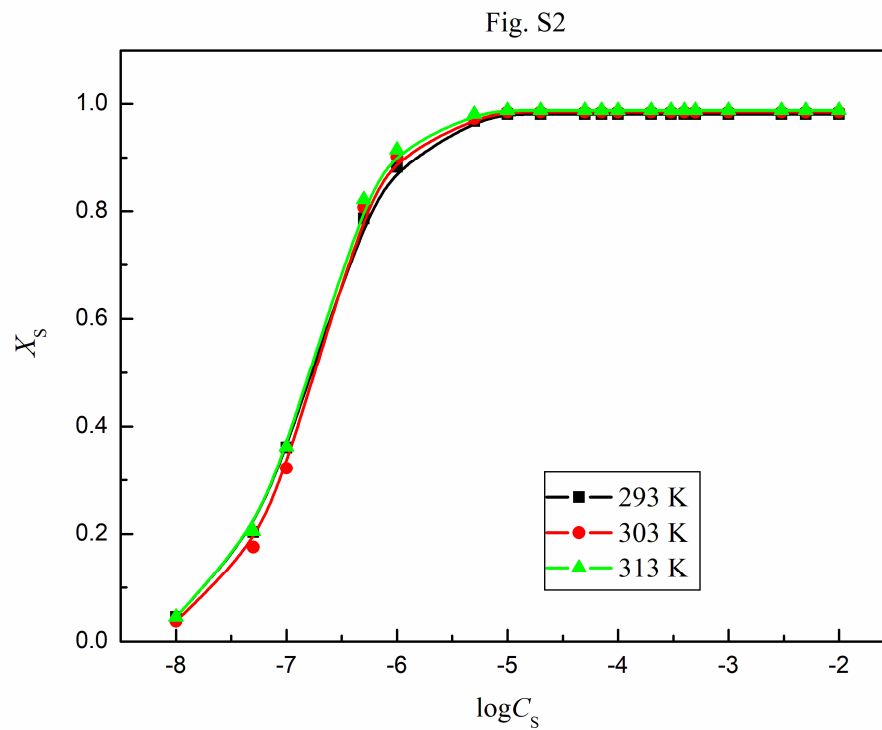

**Fig. S3.** A plot of logarithm of mole fraction of the area occupied by TS-OE12 at the water-air interface ( $X_s$ ) vs. the logarithm of its concentration ( $\log C_s$ ) at a temperature equal to 293 K, 303 K and 313 K determined from Eq. (6).

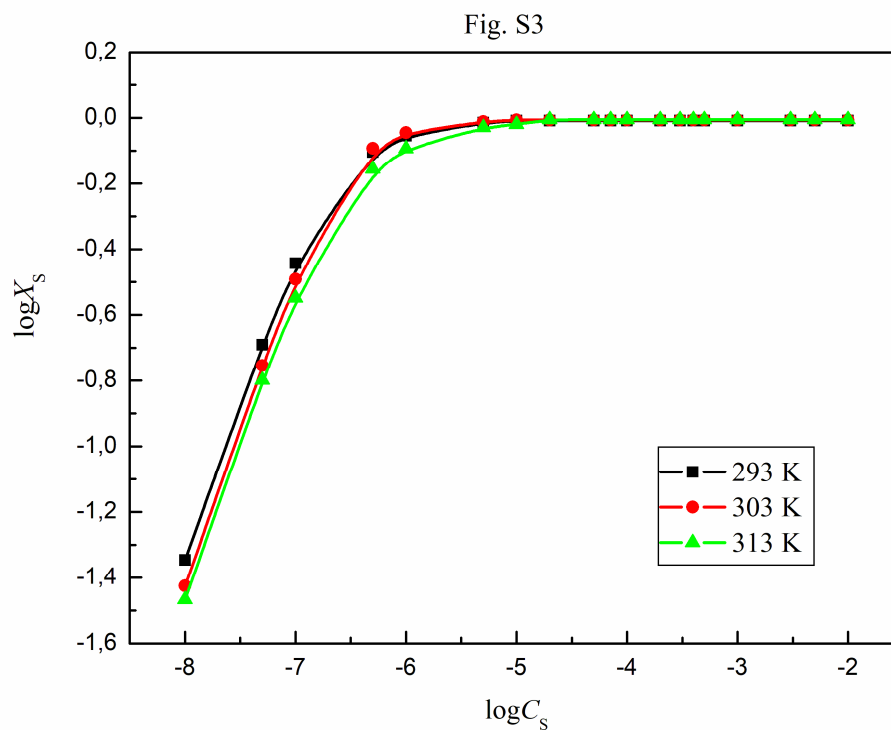

**Fig. S4** Values of surface tension ( $\gamma_{LV}$ ) of aqueous solutions of TS-OE12 (curves 1–3) determined from Eq. (7) at 298 K, 303 K and 313 K vs. the logarithm of surfactant concentration ( $\log C_s$ ).

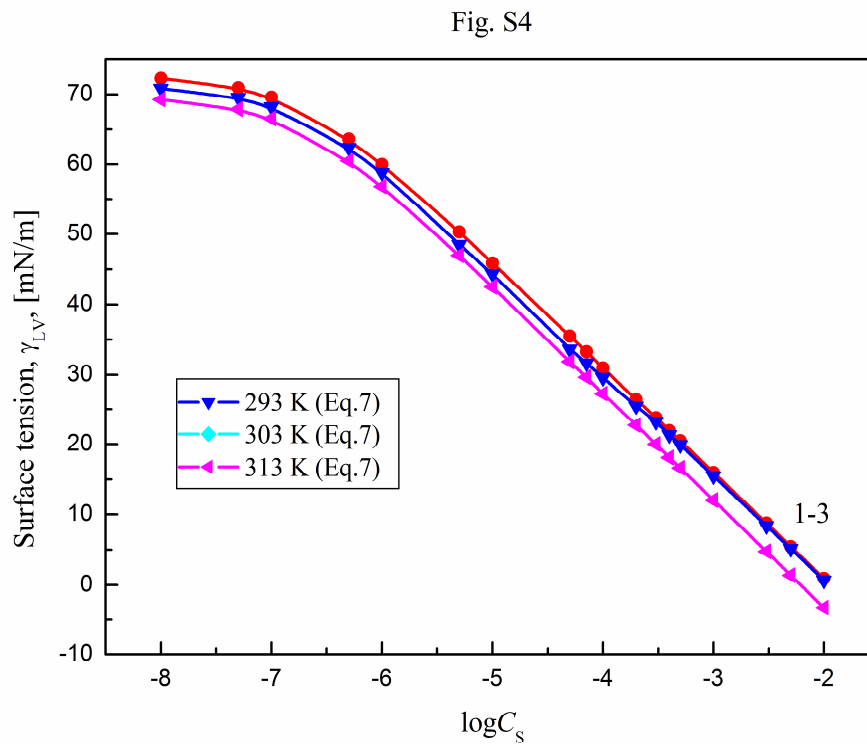

**Fig. S5** A plot of the pyrene  $I_1/I_3$  and  $I_3/I_1$  ratios vs. the logarithm of TS-OE12 concentration ( $\log C_s$ ) at 303 K.

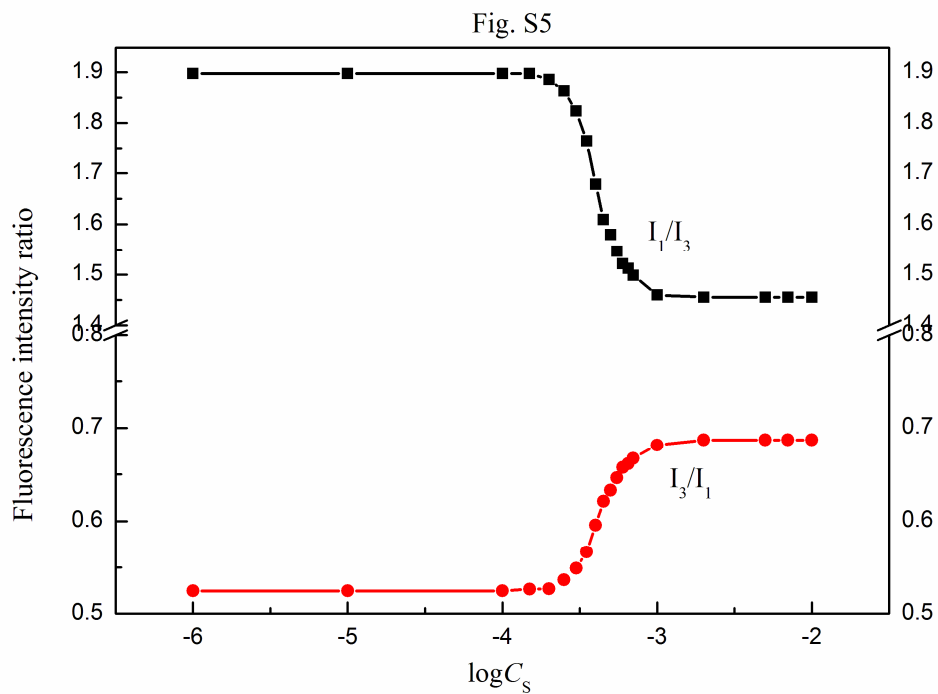

**Fig. S6** A plot of the pyrene  $I_1/I_3$  and  $I_3/I_1$  ratios vs. the logarithm of TS-OE12 concentration ( $\log C_s$ ) at 313 K.

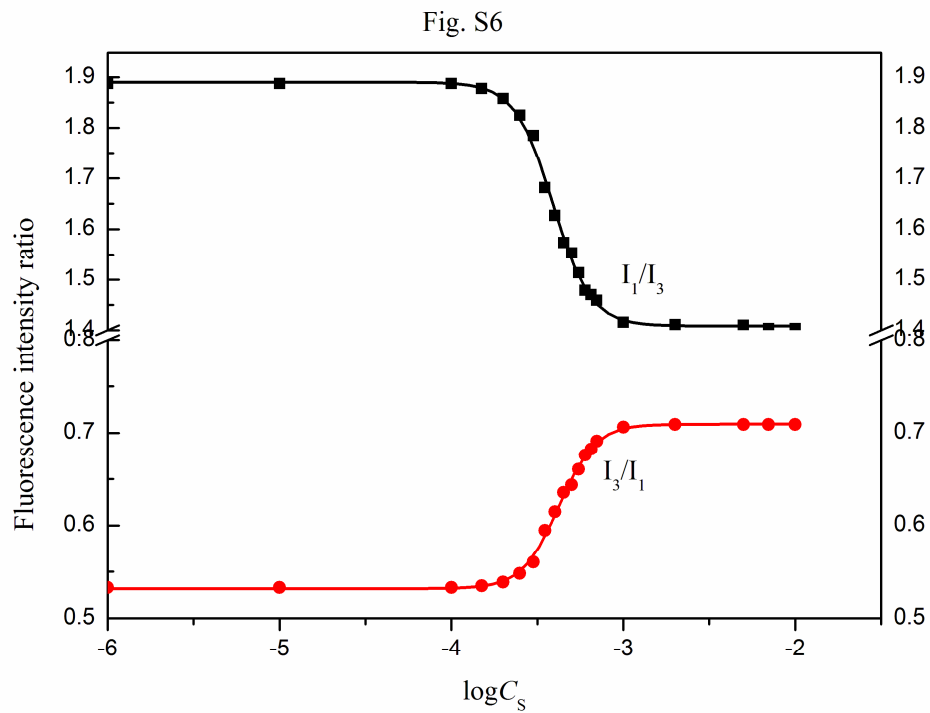

Supplement: s1 [file s1]
